# Supplementary material for: Wearable Microfluidic Sweat Chip for Detection of Sweat Glucose and pH in Long-Distance Running Exercise
Source: MDPI journal article supplement (doi:10.3390/bios13020157), 2023-01-19
Supplement: s1 [file s1]

*Supporting Information*

# **Wearable Microfluidic Sweat Chip for Detection of Sweat Glucose and pH in Long-Distance Running Exercise**

**Dong Liu <sup>1</sup>, Zhenyu Liu <sup>2</sup>, Shilun Feng <sup>3</sup>, Zehang Gao <sup>3,4</sup>, Ran Chen <sup>1,5</sup>, Gaozhe Cai <sup>3,\*</sup> and Shengtai Bian <sup>1,\*</sup>**

<sup>1</sup> Microfluidics Research & Innovation Laboratory, School of Sport Science, Beijing Sport University, Beijing 100084, China

<sup>2</sup> School of Kinesiology, Shanghai University of Sport, Shanghai 200438, China

<sup>3</sup> State Key Laboratory of Transducer Technology, Shanghai Institute of Microsystem and Information Technology, Chinese Academy of Sciences, Shanghai 200050, China

<sup>4</sup> Department of Clinical Laboratory, Third Affiliated Hospital of Guangzhou Medical University, Guangzhou 510150, China

<sup>5</sup> School of Management, Beijing Sport University, Beijing 100084, China

\* Correspondence: gaozhe@mail.sim.ac.cn (G.C.); bst13@tsinghua.org.cn (S.B.).

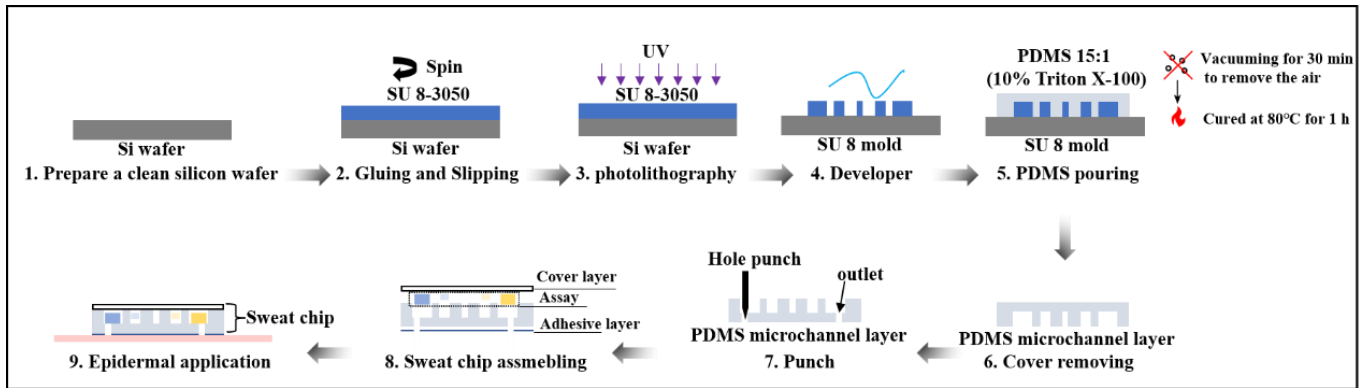

**Figure S1.** The fabrication processing of microfluidic sweat chip.

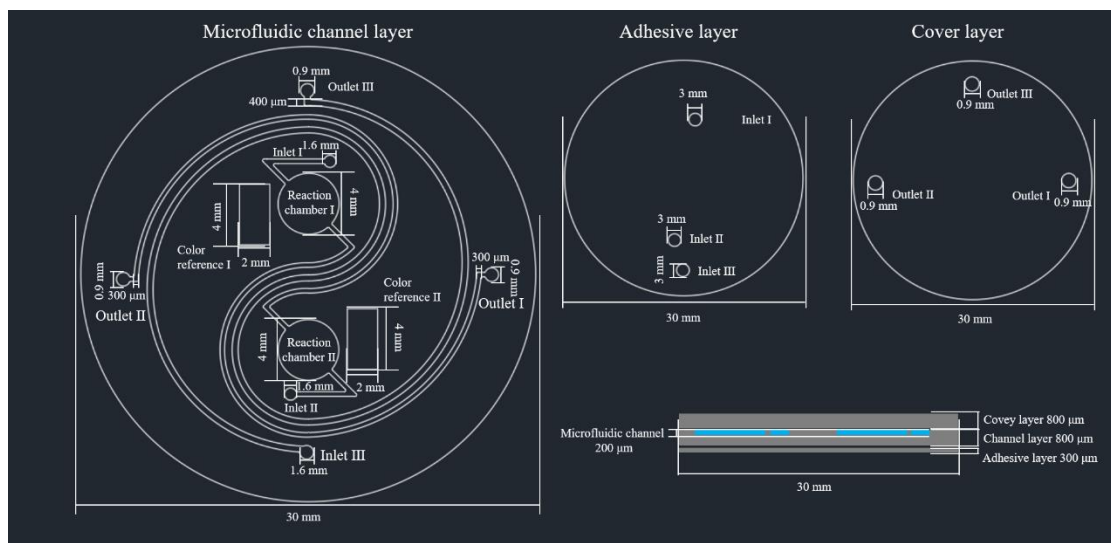

**Figure S2.** The detailed chip design parameters.

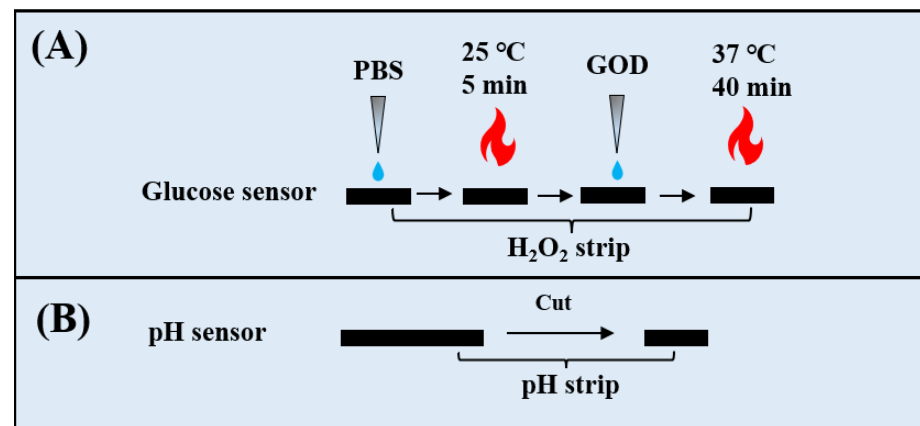

**Figure S3.** Paper-based glucose and pH sensors fabrication process. (A) The fabrication process of the glucose sensor is as follows: First, cut the  $\text{H}_2\text{O}_2$  test strip into small discs (diameter: 3 mm). 2.5  $\mu\text{L}$  of pH=5.7 PBS solution was dropped on the test paper and dried at 25°C for 10 min. Then, 2.5  $\mu\text{L}$  of 200 U/mL GOD solution prepared with pH=5.7 PBS solution was dropped on the paper and dried at 37°C for 40 min. The functionalized glucose sensor was stored at 4°C for later use. (B) The production of pH sensor only needs to cut the pH test paper into 3 mm diameter discs for later use, which is very convenient.

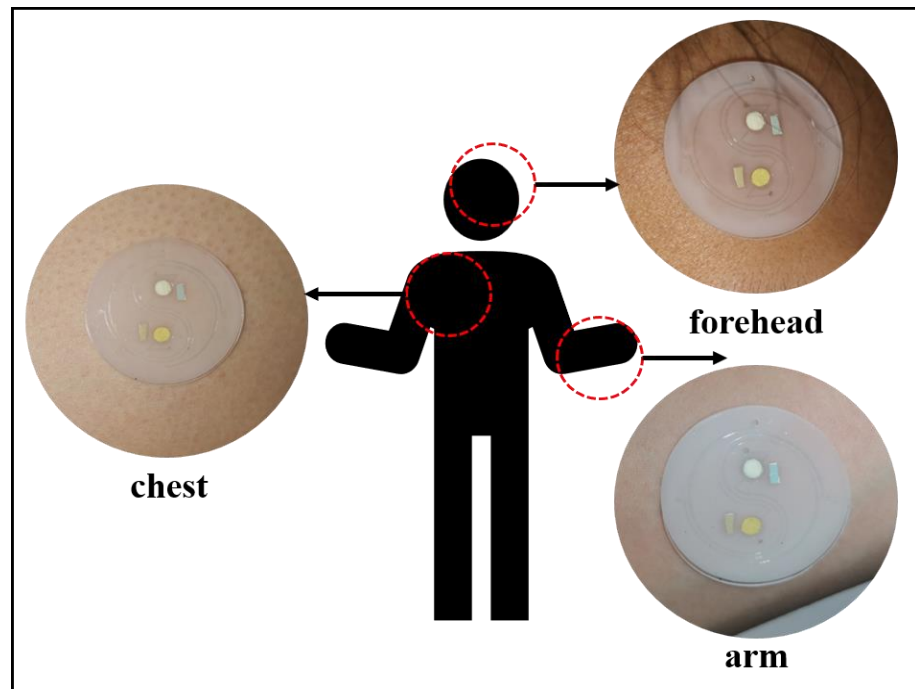

**Figure S4.** Microfluidic sweat chip chips are attached to different parts of the human body (forehead, arm, chest, etc.).

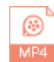

Test of water  
absorption perfoi

**Video S1:** Using blue ink to test the water absorption performance of the microfluidic sweat chip.
